# Supplementary material for: Clinical Impact of Systematic Assessment and Psychoeducation in Specialized Treatment of Adolescents with Severe Functional Somatic Disorders: Results from the AHEAD Study
Source: Preprints.org preprint supplement (doi:10.20944/preprints202305.1489.v1), 2023-05-22
Supplement: Supplementary file 1 [file supplementary]

###### Supplementary material

###### Figure S1. Chronological overview of health care contacts and social events


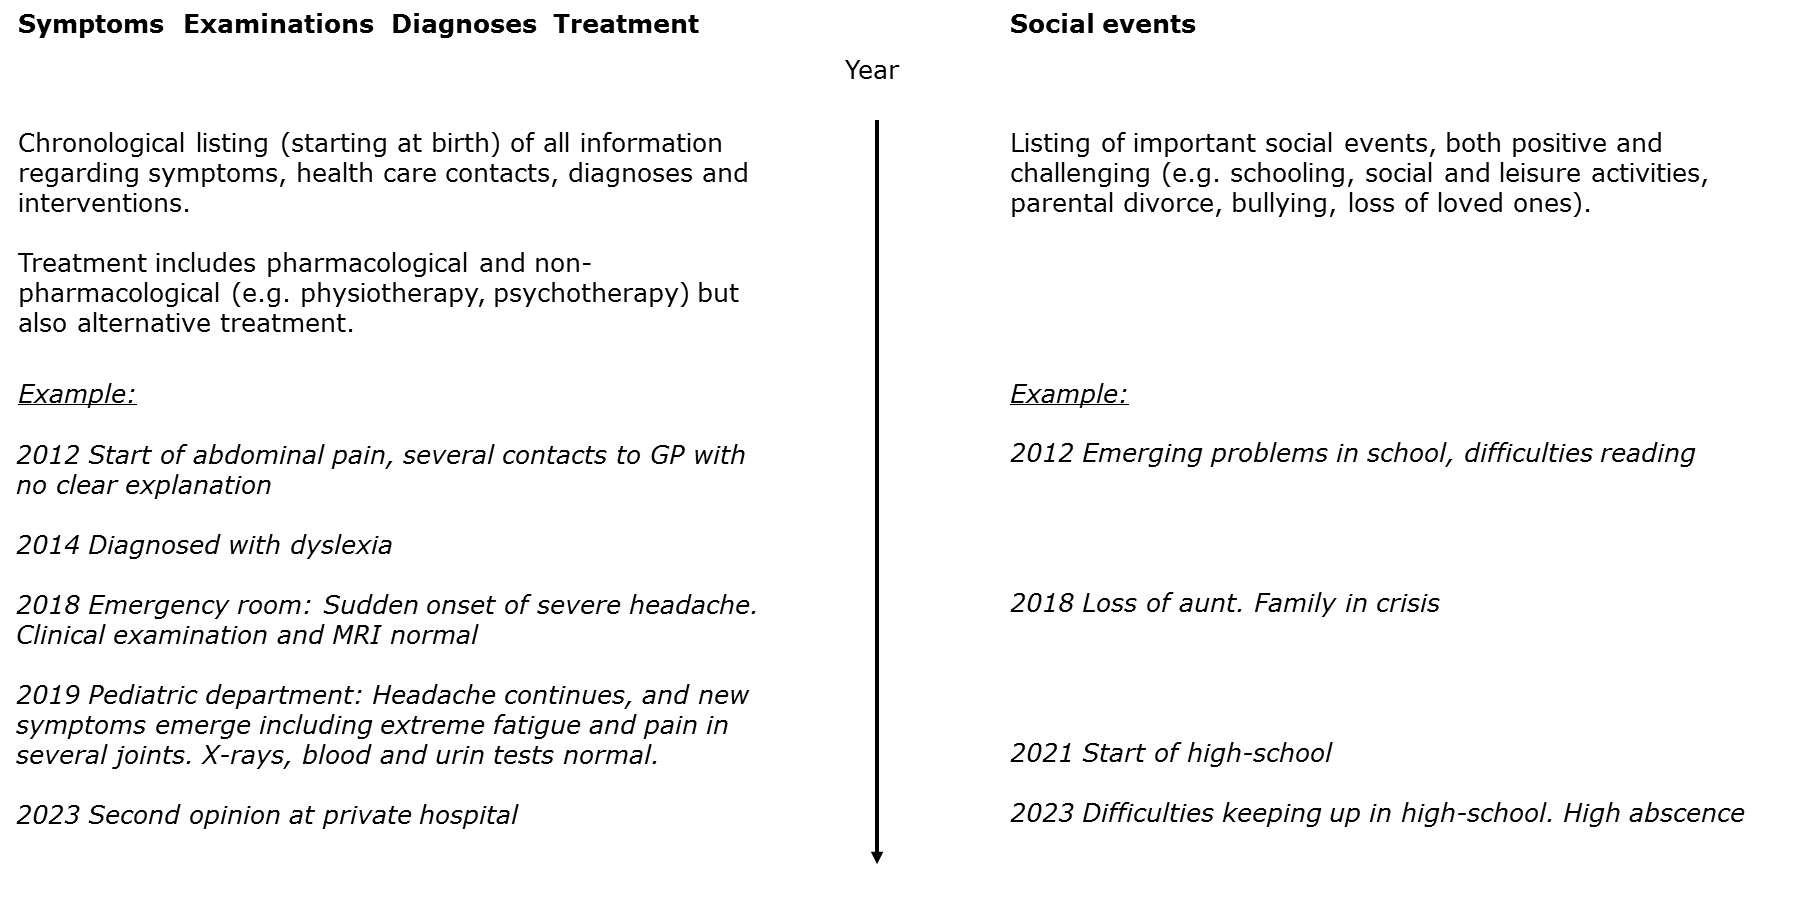
GP: general practitioner; MRI: Magnetic Resonance Imaging

###### Figure S2 Experience of assessment divided by randomization group


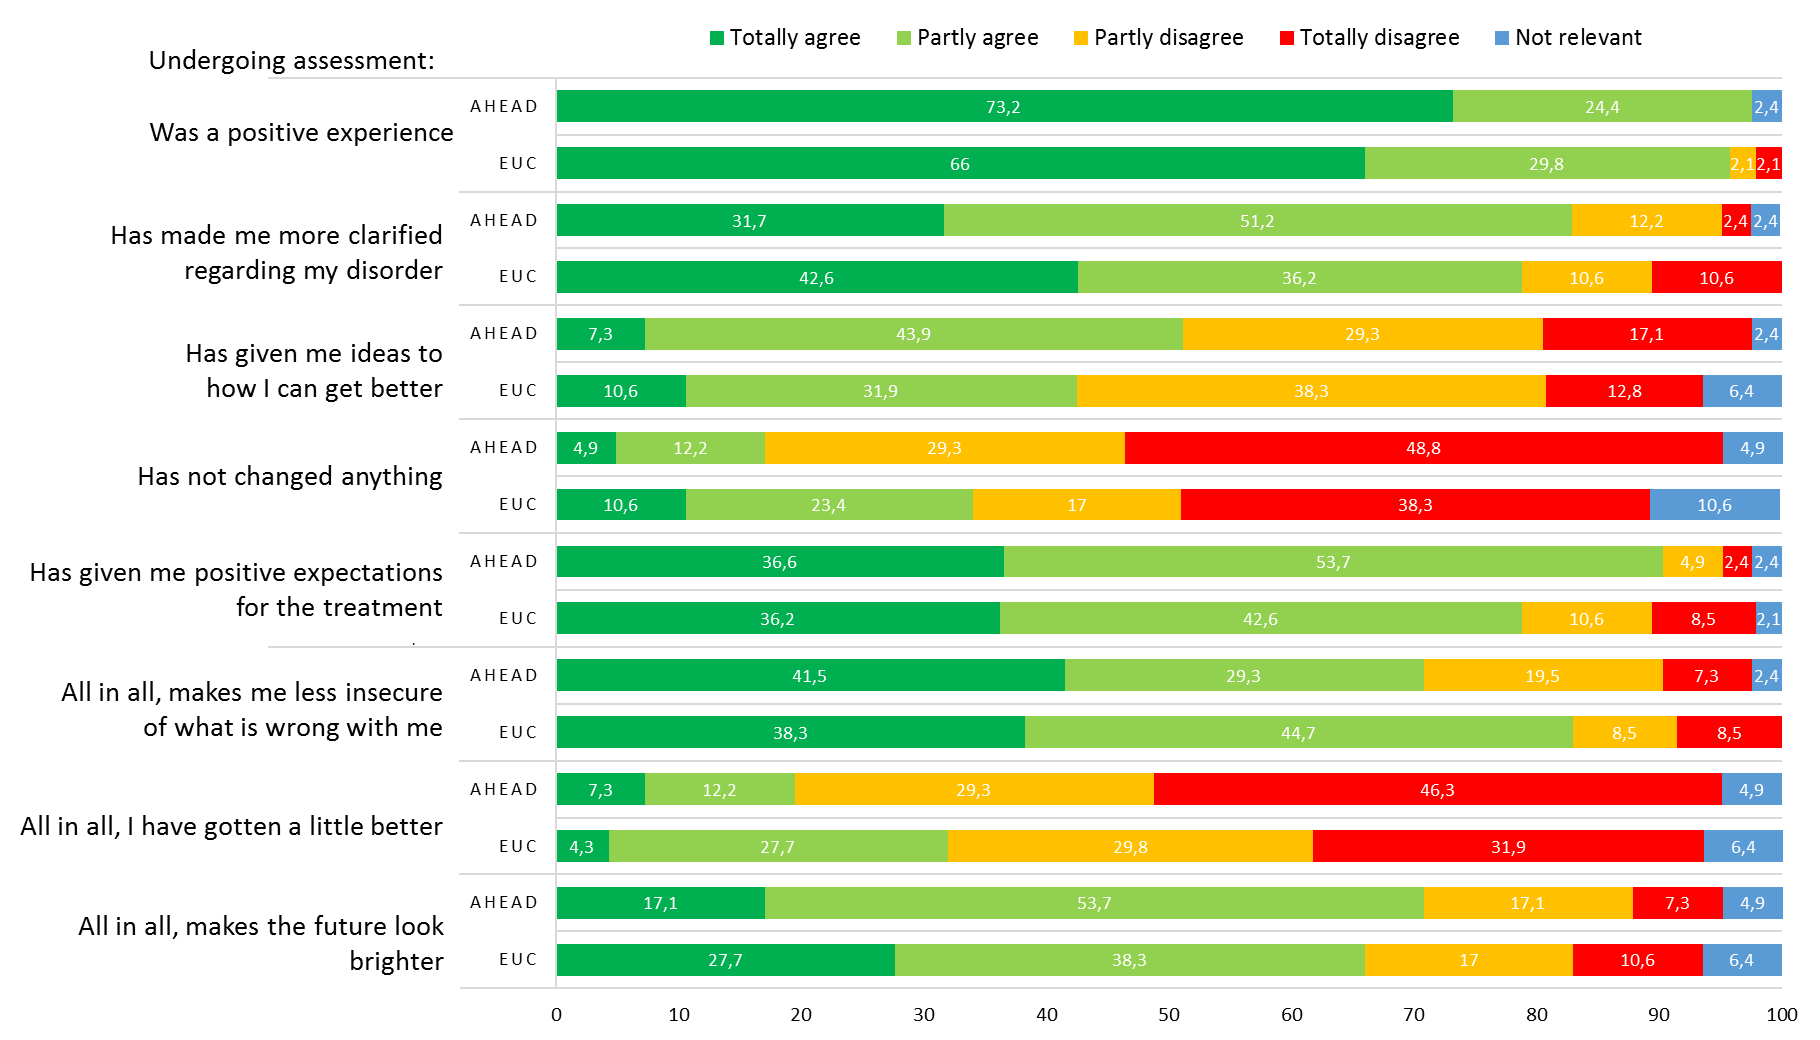


Numbers in figure represent percentage

AHEAD n=41 (missing n=3), EUC n=47 (missing n=0)

**Table S1 Mean and SD at T0 and T1**

|  |  | AHEAD (T0) | | AHEAD (T1) | | EUC (T0) | | EUC (T1) | |
| --- | --- | --- | --- | --- | --- | --- | --- | --- | --- |
|  |  | Mean | SD | Mean | SD | Mean | SD | Mean | SD |
| Primary outcome |  |  |  |  |  |  |  |  |  |
| Physical health | SF-36 (15-65) | 36.58 | 5.83 | 36.43 | 6.71 | 37.10 | 7.79 | 38.48 | 6.82 |
| Secondary outcomes |  |  |  |  |  |  |  |  |  |
| Symptom severity | SCL-som (0-4) | 2.01 | 0.74 | 1.81 | 0.63 | 1.81 | 0.81 | 1.67 | 0.69 |
| Illness worry | Whiteley-6-R (0-4) | 1.62 | 1.15 | 1.03 | 0.97 | 1.71 | 1.06 | 1.00 | 0.89 |
| Mental health | SF-36 MCS | 35.66 | 16.49 | 37.57 | 15.17 | 35.80 | 11.75 | 36.57 | 10.64 |
| Treatment targets |  |  |  |  |  |  |  |  |  |
| Illness perception | B-IPQ (0-80) | 52.27 | 7.68 | 49.02 | 10.11 | 51.37 | 8.07 | 45.98 | 9.33 |
| Illness-related behaviour | BRIQ- All or nothing (6-30) | 19.41 | 4.47 | 18.37 | 5.19 | 18.85 | 4.78 | 18.36 | 3.70 |
|  | BRIQ- Limiting (7-35) | 23.50 | 5.19 | 22.26 | 4.93 | 23.64 | 5.48 | 22.04 | 5.17 |
| Psychological inflexibility | AFQ-Y8 (0-32) | 11.57 | 9.20 | 11.38 | 8.46 | 13.34 | 7.36 | 11.97 | 7.01 |
|  | PIPS- Avoidance (8-56) | 35.16 | 9.97 | 31.48 | 10.13 | 34.53 | 10.98 | 32.30 | 10.55 |
|  | PIPS- Fusion (4-28) | 21.93 | 3.88 | 21.33 | 4.84 | 22.06 | 4.96 | 20.77 | 5.01 |

T0: Questionnaires at baseline prior to assessment

T1: Questionnaires at approximately 2 months prior to specialized treatment
